# Supplementary material for: Dynamic evolution of isolated Ru–FeP atomic interface sites for promoting the electrochemical hydrogen evolution reaction
Source: Royal Society of Chemistry journal article supplement (doi:10.1039/d0ta08940k), 2020-01-01
Supplement: d0ta08940k1.pdf [file d0ta08940k1.pdf]

## Supplementary Information

### Experimental Section

#### Chemicals

RuCl<sub>3</sub>, FeCl<sub>3</sub>, NaNO<sub>3</sub>, NaH<sub>2</sub>PO<sub>2</sub>, HCl and acetonitrile were purchased from Sinopharm Chemical. The solvent in the experiment was deionized water.

#### Preparation of Ru-modified FeOOH and Ru-modified FeP

First, 5 mg RuCl<sub>3</sub> and 50 mg FeOOH (The preparation of FeOOH was reported by previous paper.<sup>1</sup>) were dispersed in 50 mL deionized water, and were stirring vigorously for 24 h at room temperature. The resultant samples were collected by washing with DI water three times, and then dried at 80 °C for 24 h in vacuum oven. The obtained Ru-modified FeOOH powder and NaH<sub>2</sub>PO<sub>2</sub> (Fe: P = 1: 5, molar ratio) was put in a porcelain boat, where NaH<sub>2</sub>PO<sub>2</sub> was put at the upstream side. Then, the samples were heated to 300 °C and maintained for 2 h in the Ar flow, the flow rate of Ar was 30 ml/min and the heating rate was 2 °C/min. Ru-modified FeP was collected after cooled to ambient temperature.

#### Characterization

The XRD patterns were characterized in Bruker D8 Advance X-ray diffractometer (10 °/min). The X-ray diffractometer possess monochromatized Cu K $\alpha$  radiation,  $\lambda = 1.5406 \text{ \AA}$ , tube current, 40 mA and tube voltage, 40 mV. The powder of Ru-modified FeP can be used directly for XRD test. TEM images were conducted in JEOL JEM-2100F electron microscopy, the operate voltage was 200 kV. Furthermore, the JEOL ARM-200 microscope was used to characterize the HAADF-STEM images and EDS elemental mapping, the accelerating voltage was 300 kV. Before the TEM characterizations, the catalyst was dispersed into the ethanol to form a homogeneous suspension, which was then used for TEM characterizations. The X-ray photoelectron spectra (XPS) analysis was performed on Thermo escalab 250XI. The Thermo

escalab 250XI instrument is equipped with an Al K $\alpha$  source ( $h\nu= 1486.6$  eV). The binding energy scale of all measurements was calibrated by referencing C 1s to 284.8 eV. The Agilent ICPOES730 was used for the inductively coupled plasma optical emission spectrometry (ICP-OES). The concentration of Ru atom was directly measured by ICP-OES.

## Electrochemical measurements

We conducted the electrochemical measurements in a three-electrode cell. Typically, the homogeneous ink was prepared by mixing the sample (4mg), Nafion solution (0.05 wt%, 10uL) with 1ml water-isopropanol solution (1:1, volume ratio) through sonicating. Subsequently, a certain volume of the suspension was dropped onto the surface of glassy carbon electrode to make the catalyst loading of 0.408 mg cm<sup>-2</sup>. The HER polarization curve was conducted in H<sub>2</sub>-saturated 0.5 M H<sub>2</sub>SO<sub>4</sub> electrolyte with a scan rate of 5 mV s<sup>-1</sup>. The working electrode was the glassy carbon electrode (5mm in diameter), the counter electrode was graphite rod and the Hg/Hg<sub>2</sub>Cl<sub>2</sub> (in 3 M KNO<sub>3</sub> solution) electrode was the reference electrode. All potentials measured were calibrated vs RHE using the following equation:

$$E_{\text{RHE}} = E_{\text{Hg/Hg}_2\text{Cl}_2} + 0.0592 \times \text{PH} + 0.242$$

The uncompensated ohmic resistance (R) was measured by the iR compensation function of the workstation. The iR correction was conducted as  $E_{\text{corr}} = E - iR$ , where E was the applied overpotential, and i was the current density. All potentials used has been converted to the reversible hydrogen electrode (RHE).

The turnover frequency (TOF) value was calculated according to the previous report,<sup>2, 3</sup> and the detail was described as below:

$$\text{TOF} = \frac{\text{Total hydrogen turnovers per geometric area}}{\text{Active sites per geometric area}}$$

The total number of hydrogen turn overs was calculated from the current density according to:

$$\begin{aligned} \#_{\text{H}_2} &= \left( j \frac{\text{mA}}{\text{cm}^2} \right) \left( \frac{1 \text{C/s}}{1000 \text{mA}} \right) \left( \frac{1 \text{mol } e^-}{96485.3 \text{C}} \right) \left( \frac{1 \text{mol } \text{H}_2}{2 \text{mol } e^-} \right) \left( \frac{6.02 \times 10^{23} \text{ molecules } \text{H}_2}{1 \text{mol } \text{H}_2} \right) \\ &= 3.12 \times 10^{15} \frac{\text{H}_2/\text{s}}{\text{cm}^2} \text{ per } \frac{\text{mA}}{\text{cm}^2} \end{aligned}$$

The upper limit of the number of active sites was calculated based on the hypothesis that all Ru atoms in the Ru-modified FeP catalyst formed active Ru(+3)-P<sub>4</sub>-Fe centers and all of them were accessible to the electrolyte. The real number of active sites were twice the accessible Ru sites and should be considerably lower than the calculated value. The bulk Ru content of Ru-modified FeP revealed by the ICP-OES measurement was 0.95 wt%. Accordingly, the upper limit of active Ru site density is:

$$\frac{0.95}{100} \times \frac{mg}{mg} \times 0.408 \frac{mg}{cm^2} \times \frac{1}{101.07} \times \frac{mmol}{mg} \times 6.022 \times 10^{20} \frac{sites}{mmol}$$

$$= 2.31 \times 10^{16} sites cm^{-2}$$

the upper limit of active site density is:  $4.62 \times 10^{16} sites cm^{-2}$

For example, at an overpotential of 100 mV, the HER current density is  $22.2 mA cm^{-2}$ , and the TOF of the Ru-modified FeP was calculated to be

$$TOF = \left( \frac{3.12 \times 10^{15} \frac{H_2/s}{cm^2} per \frac{mA}{cm^2} \times 22.2 \frac{mA}{cm^2}}{4.62 \times 10^{16} sites cm^{-2}} \right) = 1.50 s^{-1}$$

Similarly, the TOF value of Ru-modified FeP at an overpotential of 200 mV was calculated to be

$$TOF = \left( \frac{3.12 \times 10^{15} \frac{H_2/s}{cm^2} per \frac{mA}{cm^2} \times 34.8 \frac{mA}{cm^2}}{4.62 \times 10^{16} sites cm^{-2}} \right) = 2.35 s^{-1}$$

The faradaic efficiency is calculated based on the equation:  $\eta = znF/Q$ . where  $\eta$  is the faradaic efficiency of hydrogen,  $z$  is the number of electrons required to form a molecule of  $H_2$ ,  $n$  is the measured amount of product (mol),  $F$  is the Faraday constant ( $96,500 C mol^{-1}$ ),  $Q$  is the quantity of electricity consumption.

### Ex-situ XAFS measurements

We used the Shanghai Synchrotron Radiation Facility (SSRF, BL14W1 station, operated at 3.5 GeV with a maximum current of 250 mA) to perform the Ru K-edge X-ray absorption data. The samples were placed in an aluminum sample holder, and then the data was collected in the mode of fluorescence. We use the first peak maximum of the first derivative of a Ru foil (22117 eV) to calibrate the energy. The spectra for references were collected in the mode of transmission. The data obtained were all performed at room temperature.

We used the Beijing Synchrotron Radiation Facility (BSRF, BL1W1B station, operated at 2.5 GeV with a maximum current of 250 mA) to perform the Fe K-edge X-ray absorption data. The samples were placed in an aluminum sample holder, and then the data was collected in

the mode of fluorescence. We use the first peak maximum of the first derivative of a Fe foil (7112 eV) to calibrate the energy. The spectra for references were collected in the mode of transmission. The data obtained were all performed at room temperature.

### **Operando Electrochemical XAS Measurements**

The operando experiments were performed in organic glass electrochemical cell. A single circular hole of 1.5 cm in the flat walls establish a link between the electrolyte and the catalyst. The side of carbon cloth with Ru-modified FeP coating faced inward. The coated carbon cloth was connected with the electrochemical workstation through a slip of copper. Before the experiment, we poured H<sub>2</sub>SO<sub>4</sub> electrolyte into the cell. The reference electrode fixed by the organic glass cap was used for the entire experiment to make the distance between working and reference electrode constant. The homogeneity of the materials was measured by recording at different positions of the coated carbon cloth. The Ru K-edge (BL14W1 in SSRF) and the Fe K-edge (BL1W1B in BSRF) spectra were recorded at the same electrodes. Spectra were recorded on the dry Ru-modified FeP films at first and then in H<sub>2</sub>SO<sub>4</sub> solution at open circuit potential and -80 mV vs RHE. We recorded five spectrums at Ru K-edge and three spectrums at Fe K-edge, at each potential. Before transfer to the next potential, the system enabled to restore balance for 20 min. Results identified that the spectra recorded at a given potential was no noticeable change.

### **XAFS Data Analysis**

The acquired EXAFS data were processed according to the standard procedures using the Athena and Artemis implemented in the IFEFFIT software packages. The fitting detail is described below:

The acquired EXAFS data were processed according to the standard procedures using the ATHENA module implemented in the IFEFFIT software packages. The EXAFS spectra were obtained by subtracting the post-edge background from the overall absorption and then normalizing with respect to the edge-jump step. Subsequently, the  $\chi(k)$  data of were Fourier

transformed to real (R) space using a hanning windows ( $dk=1.0 \text{ \AA}^{-1}$ ) to separate the EXAFS contributions from different coordination shells. To obtain the quantitative structural parameters around central atoms, least-squares curve parameter fitting was performed using the ARTEMIS module of IFEFFIT software packages.<sup>4</sup>

The following EXAFS equation was used:

$$\chi(k) = \sum_j \frac{N_j S_o^2 F_j(k)}{k R_j^2} \exp[-2k^2 \sigma_j^2] \exp\left[-\frac{2R_j}{\lambda(k)}\right] \sin[2k R_j + \phi_j(k)]$$

$S_o^2$  is the amplitude reduction factor,  $F_j(k)$  is the effective curved-wave backscattering amplitude,  $N_j$  is the number of neighbors in the  $j^{\text{th}}$  atomic shell,  $R_j$  is the distance between the X-ray absorbing central atom and the atoms in the  $j^{\text{th}}$  atomic shell (backscatterer),  $\lambda$  is the mean free path in  $\text{\AA}$ ,  $\phi_j(k)$  is the phase shift (including the phase shift for each shell and the total central atom phase shift),  $\sigma_j$  is the Debye-Waller parameter of the  $j^{\text{th}}$  atomic shell (variation of distances around the average  $R_j$ ). The functions  $F_j(k)$ ,  $\lambda$  and  $\phi_j(k)$  were calculated with the ab initio code FEFF8.2. The coordination numbers of model samples were fixed as the nominal values. The obtained  $S_o^2$  was fixed in the subsequent fitting. While the internal atomic distances  $R$ , Debye-Waller factor  $\sigma^2$ , and the edge-energy shift  $\Delta E_o$  were allowed to run freely.

## Computational Method

Density Functional Theory calculations were performed as the framework of the first-principle simulation. Interaction between electrons and nuclei was described by the projector augmented wave (PAW) pseudo-potentials.<sup>5</sup> A cut-off energy of 480 eV was selected through the calculations. The k-point was chosen to be  $2 \times 4 \times 2$  grid with a gamma point for the bulk calculations, and  $4 \times 1 \times 1$  for surface calculations. The global break condition for the electronic self-consistency loop is  $1.0e^{-5}$  eV. Hubbard-U ( $U=5.3$ ) correction is applied for Fe as the d-band correction.<sup>6-8</sup> The relaxation of ions will stop if the largest force is smaller than

0.02 eV/Å. Transition state energy is calculated with the Nudged Elastic Band (NEB) method with 3 inserted images. The global break condition for the NEB calculations is 0.05 eV/Å.<sup>9</sup>

### The detail of DFT calculations

#### 1) Free Energy of Adsorbate for Electrochemical Hydrogen evolution reaction (HER)

The adsorption free energy of H,  $\Delta G_{H^*}$  is calculated to evaluate the electrochemical activity of HER. It is shown as below,

$$\Delta G_{H^*} = G_{H^*} - G_* - \frac{1}{2} G_{H_2} \quad (1)$$

where  $G_{H^*}$  and  $G_*$  are the Gibb's free energies of the adsorbed H atom on the catalytic surface and the empty surface.  $G_{H_2}$  is the Gibb's free energies of gas phase H<sub>2</sub> molecule, which is calculated in a large supercell. The Gibb's free energy of adsorbate is calculated as,

$$\Delta G = \Delta E + \Delta ZPE - T\Delta S + \Delta G_U + \Delta G_{pH} \quad (2)$$

in which  $\Delta E$  is the reaction energy derived from Density Functional Theory (DFT) calculation,  $\Delta G_U$  is the change of the applied potential,  $\Delta G_{pH}$  is the change of the pH value.  $\Delta ZPE$  is the change of zero-point energy before and after the adsorption, which is calculated from vibrational frequencies as the following equation:

$$ZPE = \sum_i^{N_{modes}} ZPE^i = \sum_i^{N_{modes}} \frac{1}{2} h\nu_i \quad (3)$$

$\Delta S$  is the change of entropy upon adsorption of the intermediate. However, the adsorbate on the surface is considered to have an entropy of 0, because the adsorbate loses all its translational and rotational degrees of freedom. Thus,  $\Delta S$  is calculated as,

$$\Delta S_{ads} = S_{ads} - S_{gas-phase} = -S_{gas-phase} = k_B \ln(1 - e^{\frac{-h\nu_i}{k_B T}}) \quad (4)$$

$k_B$  is the Boltzmann constant. T is the operating temperature which is the room temperature (300K) in this case, and h is the Planck constant.

#### 2) Reaction pathways of Electrochemical Hydrogen evolution reaction (HER)

For a typical electrochemical HER process, three reaction pathways may occur during reaction condition, which are Volmer, Tafel and Heyrovsky steps. In this work, we used DFT to calculate the reaction free energy and reaction barrier of Volmer, Heyrovsky and Tafel steps written as below,

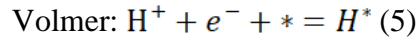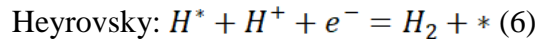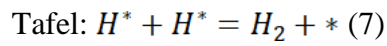

The reaction free energies are calculated as,

$$\Delta G_{\text{Volmer}} = G_{H^*} - \frac{1}{2} G_{H_2} - G_*$$

$$\Delta G_{\text{Heyrovsky}} = G_{H_2} + G_* - G_{H^*} - \frac{1}{2} G_{H_2}$$

$$\Delta G_{\text{Tafel}} = G_{H_2} + G_* - 2 * G_{H^*}$$



## Figures and tables

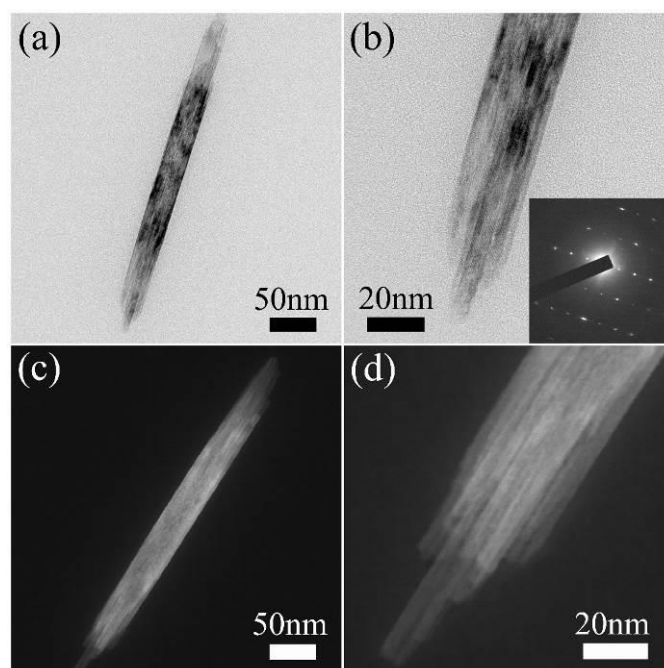

**Fig. S1.** The TEM characterizations of the isolated single atom Ru-modified FeOOH nanorods. The SAED pattern indicates that the as-prepared Ru-modified FeOOH nanorods are well crystalline.

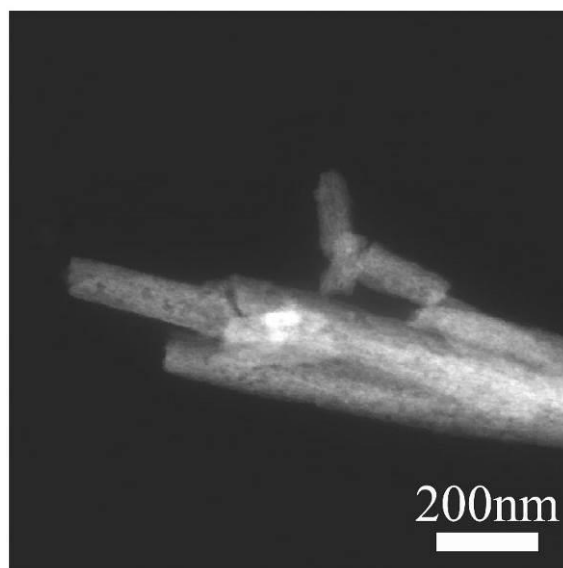

**Fig. S2.** The TEM images of the isolated single atom Ru-modified FeP. The TEM images show that the Ru-modified FeP roughly remain the rod-like shape, but the surfaces become extremely bumpy, due to the redox reaction during the phosphatizing process.

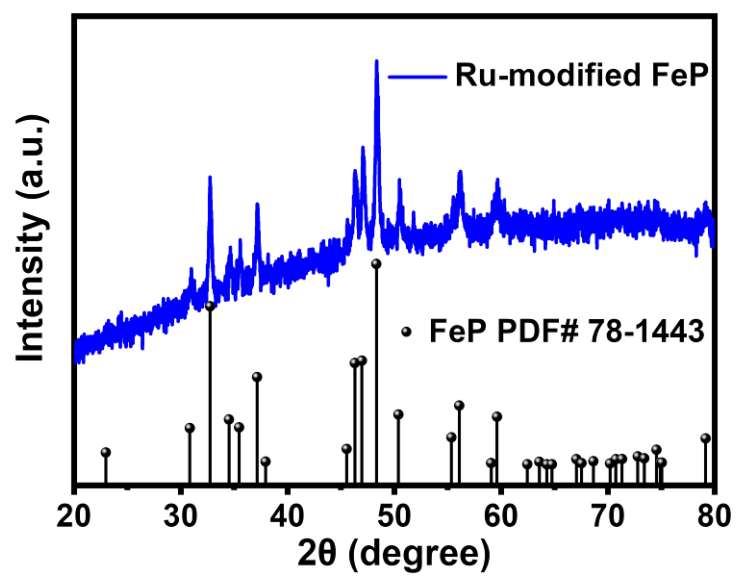

**Fig. S3.** The XRD patterns of the isolated single atom Ru-modified FeP. The X-ray powder diffraction (XRD) pattern for the Ru-modified FeP correspond to FeP (JCPDS No. 78-1443).

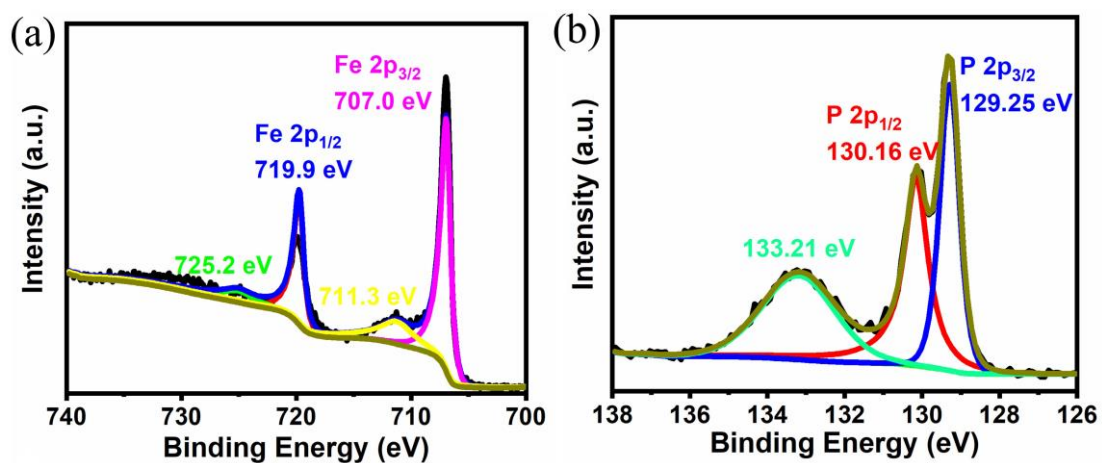

**Fig. S4.** XPS spectra in (a) Fe 2p and (b) P 2p regions for isolated single atom Ru-modified FeP.

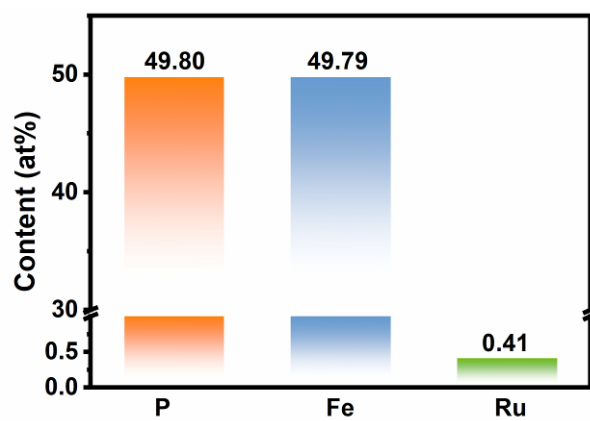

**Fig. S5.** The atomic content percentages of P, Fe and Ru in Ru-modified FeP measured by ICP-OES analysis.

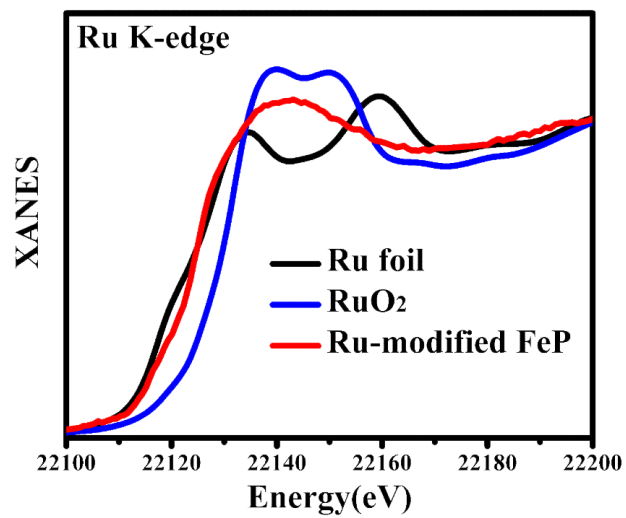

**Fig. S6.** The XANES curves of Ru K-edge for isolated single atom Ru-modified FeP. Herein, Ru foil and RuO<sub>2</sub> are used as standard references.

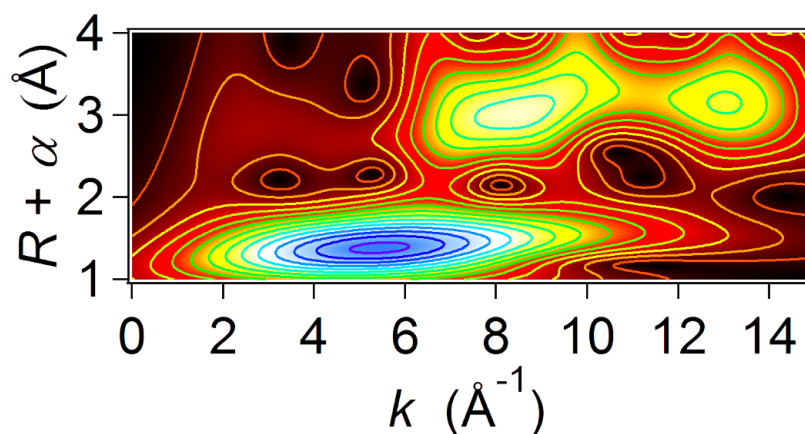

**Fig. S7.** WT plot of the RuO<sub>2</sub>. In EXAFS analysis, the FT magnitude of experimental data provides resolution in the radial distance of neighbouring scatterers. However, the information is lost at the wave number  $k$  at which the scatterer contributes. Since the position in  $k$ -space is related to the atomic species of the backscattering atom, important information is lost in the magnitude of the transformed signal. So it is necessary to develop new methods for the analysis of EXAFS, such as WT, which has powerful resolution in both  $k$  and  $R$  spaces. WT is thought to be a wonderful supplement for FT.

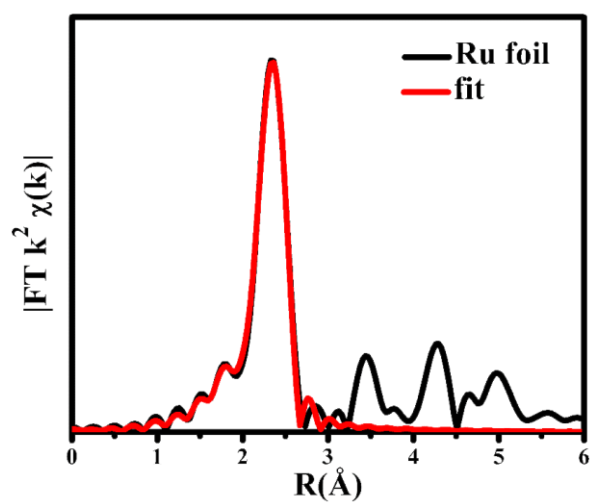

**Fig. S8.** FT-EXAFS fitting curves of the Ru foil at Ru K-edge.



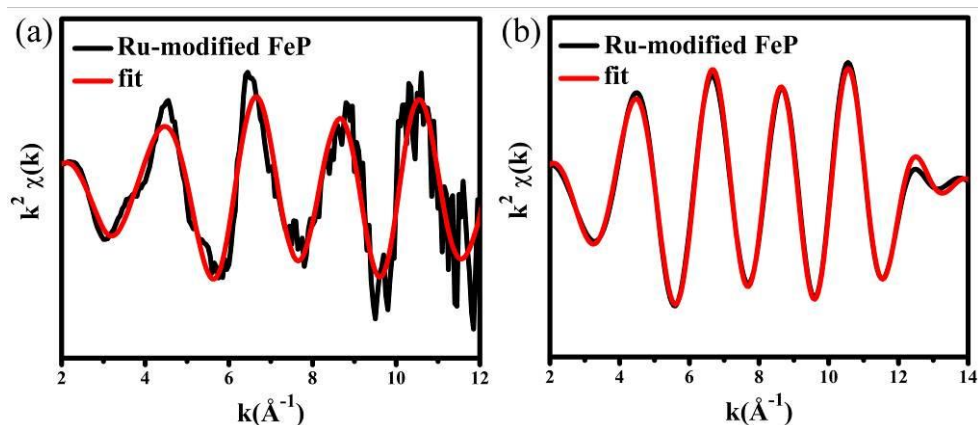

**Fig. S9.** (a) The  $k$  space EXAFS fitting curve of isolated single atom Ru-modified FeP at Ru K-edge. (b) The inversed FT-EXAFS fitting curve of Ru-modified FeP at Ru K-edge. Qualitatively, the available information from the EXAFS oscillation is the amplitude, the frequency, and the phase. To a first approximation, amplitude is proportional to coordination number, while frequency is inversely related to bond length. The phase of the EXAFS and the shape of the amplitude envelope provide information about the scatterer.

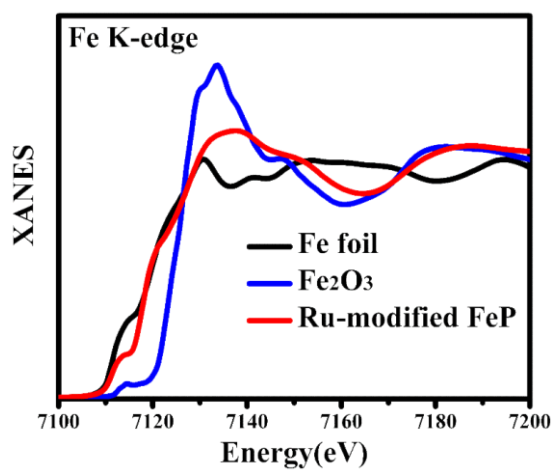

**Fig. S10.** XANES curves of Fe K-edge for isolated single atom Ru-modified FeP. The oxidation state of Fe are reflected through the absorption threshold of the XANES curves. The position of Ru-modified FeP situated between Fe foil and Fe<sub>2</sub>O<sub>3</sub>, indicating the oxidation state of Fe species in Ru-modified FeP was between the two references.

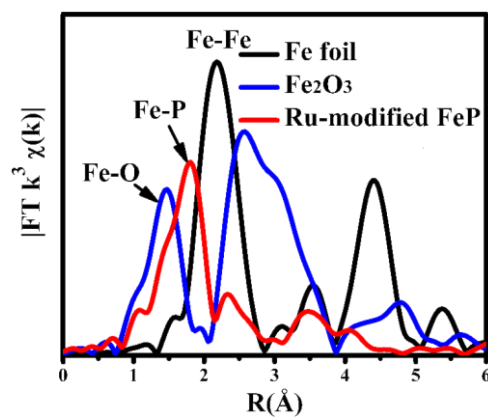

**Fig. S11.** EXAFS curves of Fe K-edge for Ru-modified FeP. The FT peak of Fe-P in Ru-modified FeP, Fe-O in Fe<sub>2</sub>O<sub>3</sub> and Fe-Fe in Fe foil is centered at 1.81 Å, 1.46 Å and 2.19 Å, respectively.

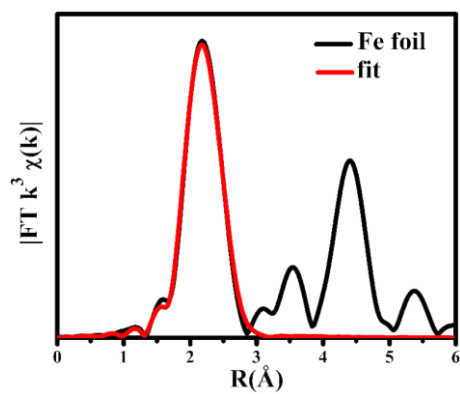

**Fig. S12.** FT-EXAFS fitting curves of the Fe foil at Fe K-edge. The obtained  $S_0^2$  was 0.75.

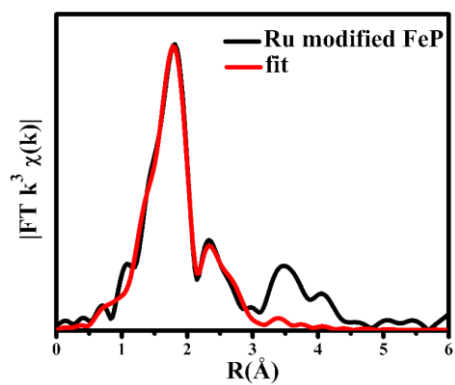

**Fig. S13.** FT-EXAFS fitting curves of the Ru-modified FeP at Fe K-edge.

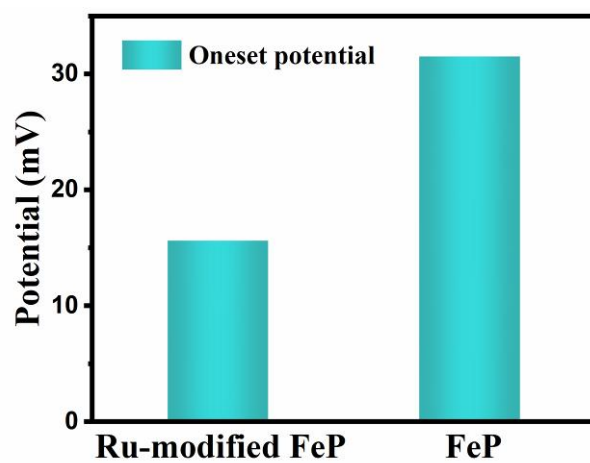

**Fig. S14.** The calculated onset potential for Ru-modified FeP and FeP.

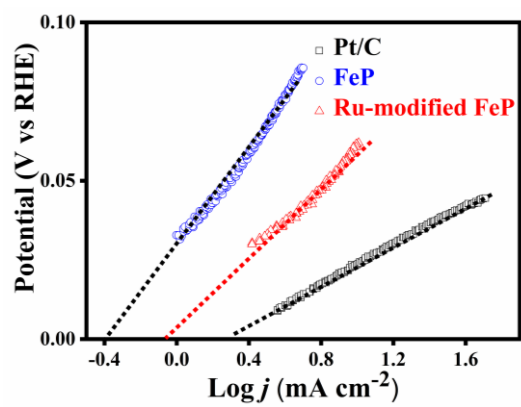

**Fig. S15.** Calculated exchange current density in 0.5 M H<sub>2</sub>SO<sub>4</sub> by applying extrapolation method to the Tafel plot.

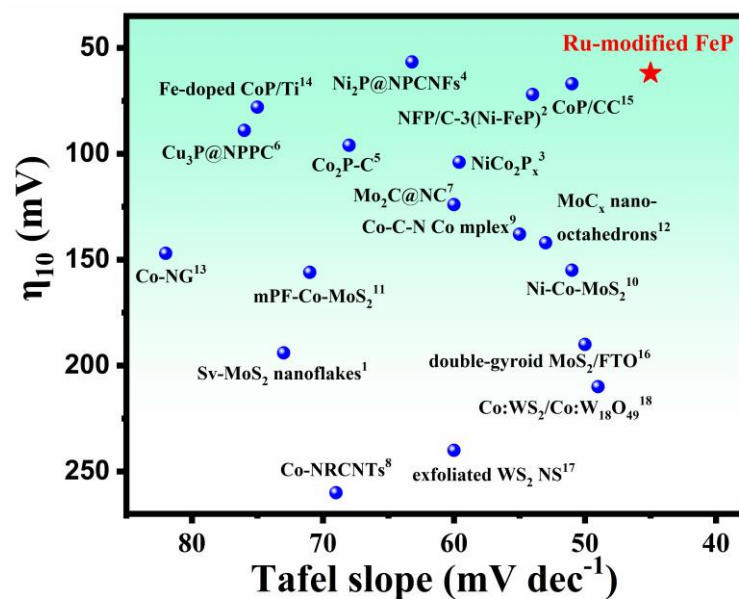

**Fig. S16.** Comparison of HER performance between isolated single atom Ru-modified FeP and other electrocatalysts in acidic media.



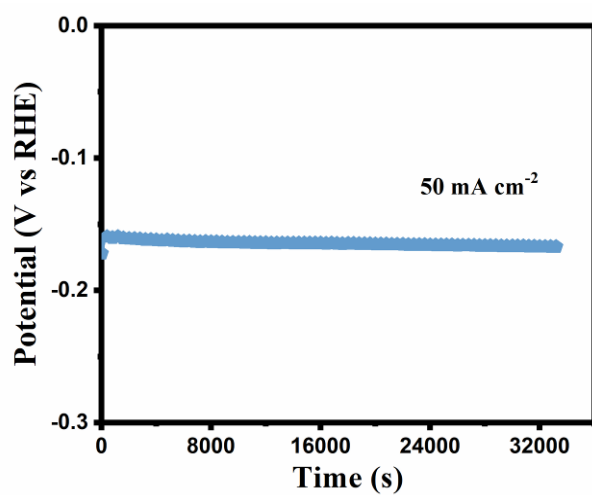

**Fig. S17.** The chronopotentiometric curve at the current density of 50 mA cm<sup>-2</sup>.

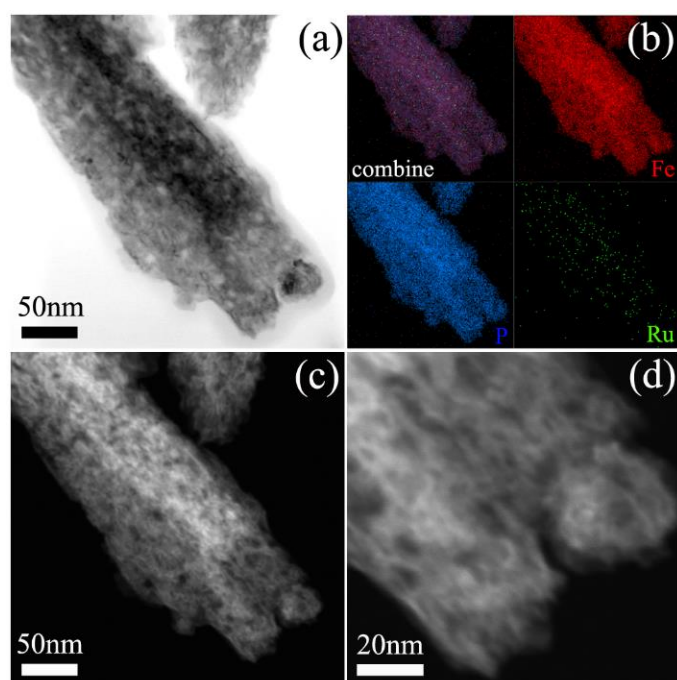

**Fig. S18.** TEM images and EDS mappings of the isolated single atom Ru-modified FeP after HER.

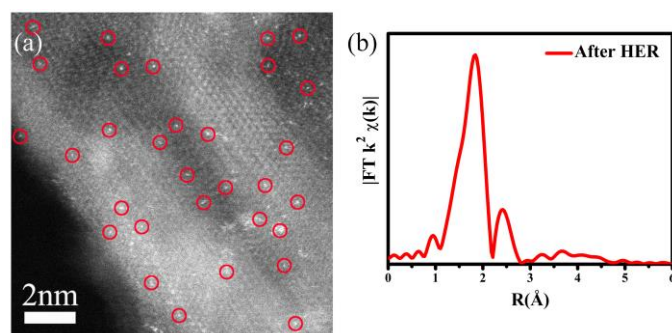

**Fig. S19.** (a) The HAADF-STEM image of the isolated single atom Ru-modified FeP after HER cycles. (b) The Ru K-edge EXAFS curve of the Ru-modified FeP after HER cycles.

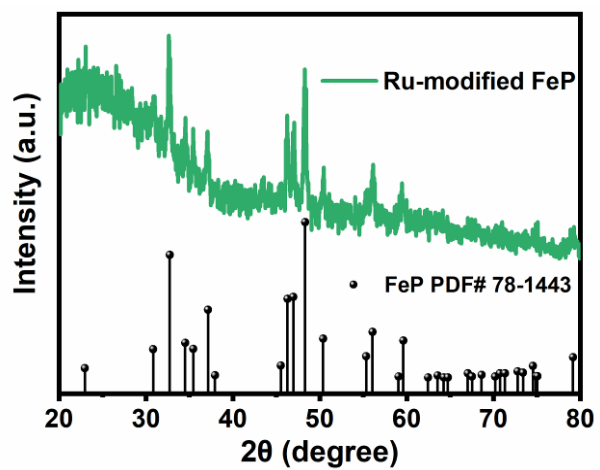

**Fig. S20.** The XRD patterns of the isolated single atom Ru-modified FeP after catalysis.

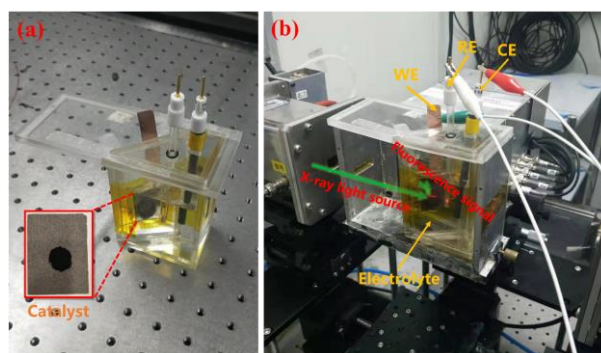

**Fig. S21.** The detail of the operando X-ray absorption spectroscopy measurement. The device is set up at BL1W1B with the support from BSRF, where the X-ray induced fluorescence model is applied. CE, counterelectrode; WE, working electrode; RE, reference electrode.

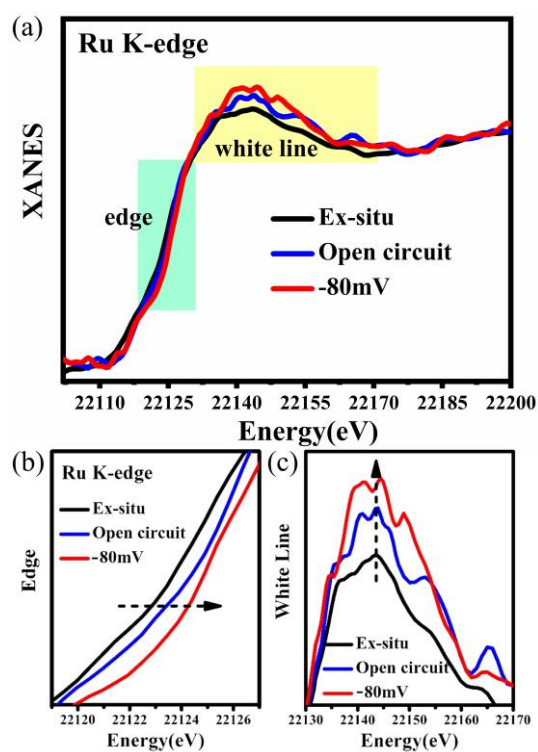

**Fig. S22.** (a) Ru K-edge XANES spectra of Ru-modified FeP during HER. (b) The absorption edge evolution and (c) the white line peak evolution of Ru-modified FeP at Ru K-edge under operando XAS condition.

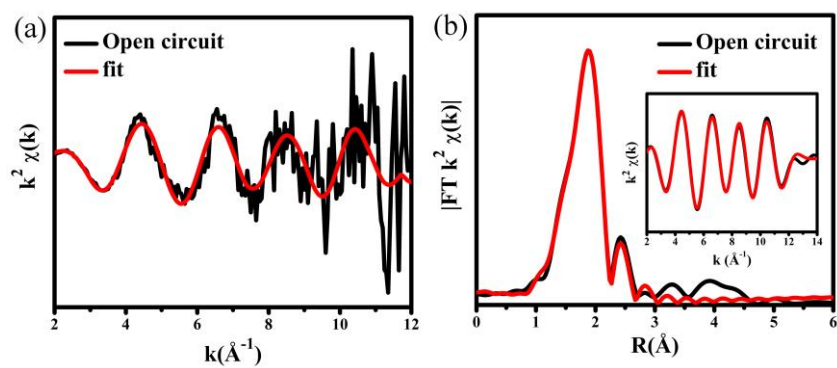

**Fig. S23.** (a) The Ru K-edge  $k$  space EXAFS and (b) FT-EXAFS fitting curve of the Ru-modified FeP at open circuit potential. The inset is the corresponding Ru K-edge inverted FT-EXAFS fitting curve.

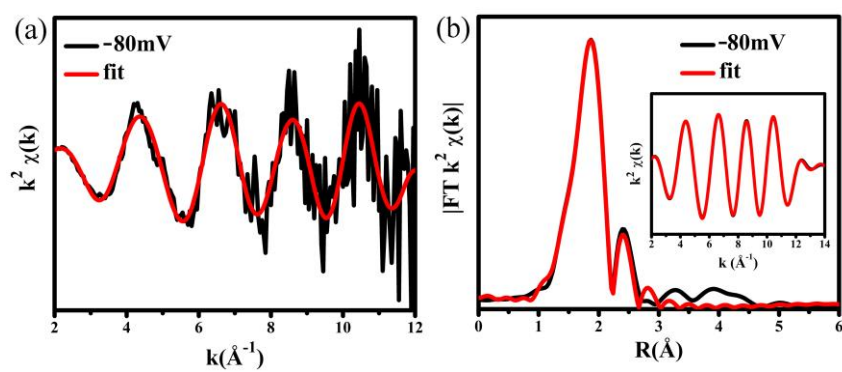

**Fig. S24.** (a) The Ru K-edge  $k$  space EXAFS and (b) FT-EXAFS fitting curve of the Ru-modified FeP at -80 mV. The inset is the corresponding Ru K-edge inverted FT-EXAFS fitting curve.



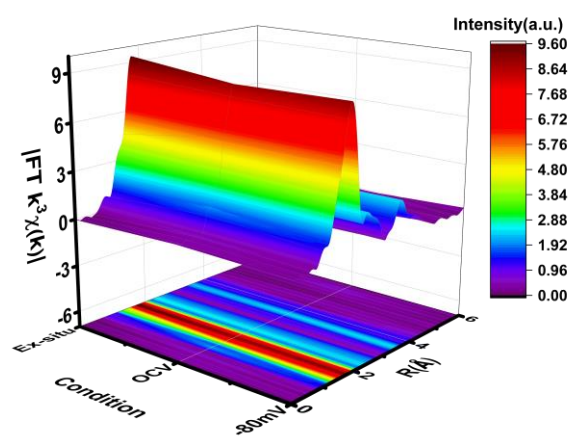

**Fig. S25.** (b)  $k^3$ -weighted Fe K-edge FT-EXAFS spectra of Ru-modified FeP during HER.

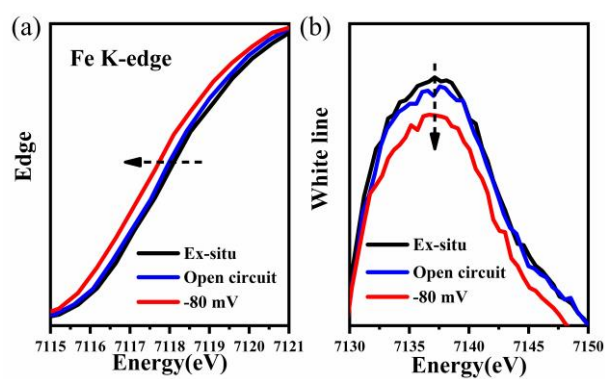

**Fig. S26.** (a) The absorption edge evolution and (b) the white line peak evolution of Ru-modified FeP at Fe K-edge under operando XAS condition

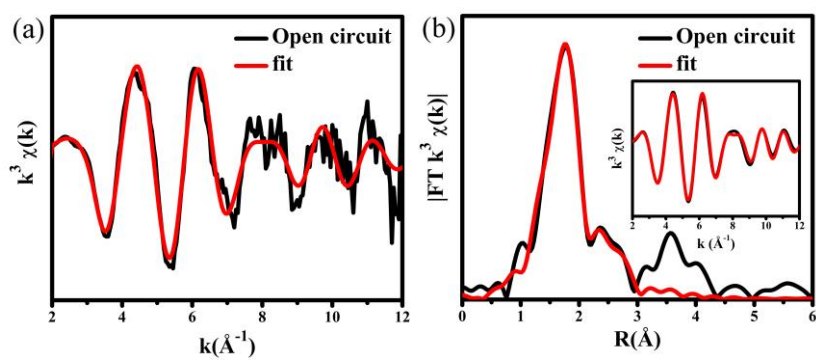

**Fig. S27.** (a) The Fe K-edge  $k$  space EXAFS and (b) FT-EXAFS fitting curve of the Ru-modified FeP at open circuit potential. The inset is the corresponding Fe K-edge inverted FT-EXAFS fitting curve.

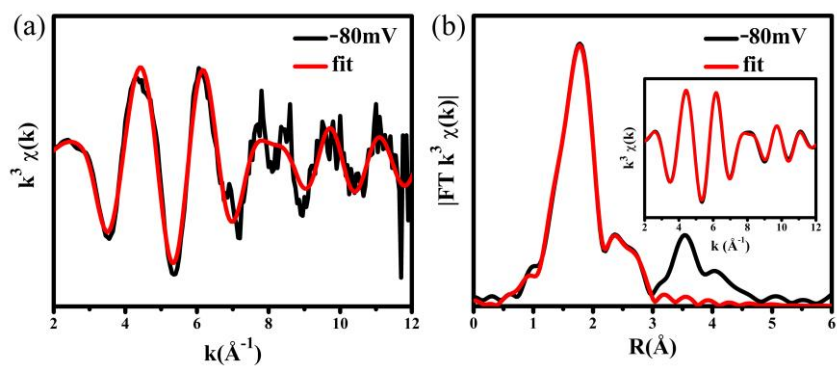

**Fig. S28.** (a) The Fe K-edge  $k$  space EXAFS and (b) FT-EXAFS fitting curve of the Ru-modified FeP at -80 mV. The inset is the corresponding Fe K-edge inverted FT-EXAFS fitting curve.

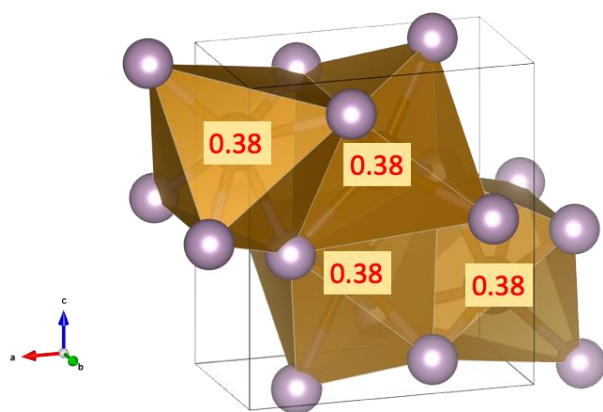

**Fig. S29.** Pnma bulk structure of Fe<sub>4</sub>P<sub>4</sub>. Numbers are magnetic moments of the Fe atoms indicating the ferromagnetic ordering. Brown is the Fe octohedral, and purple is the P atom.

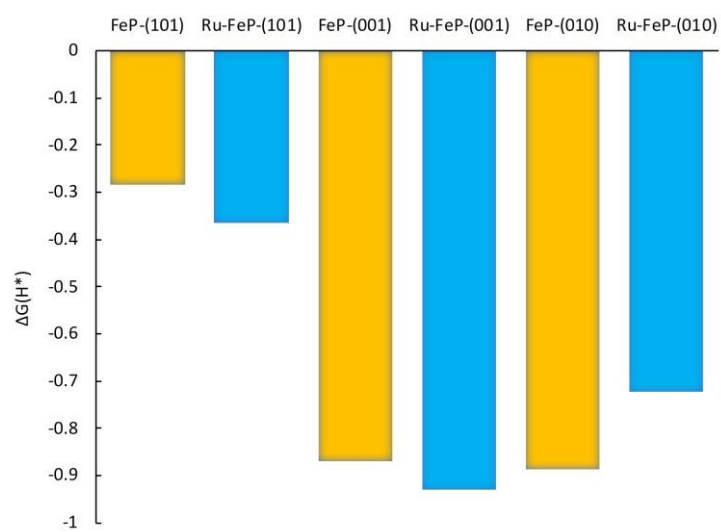

**Fig. S30.** Free energy of hydrogen adsorption ( $\Delta G_{H^*}$ ) for all Ru-modified FeP and FeP systems.

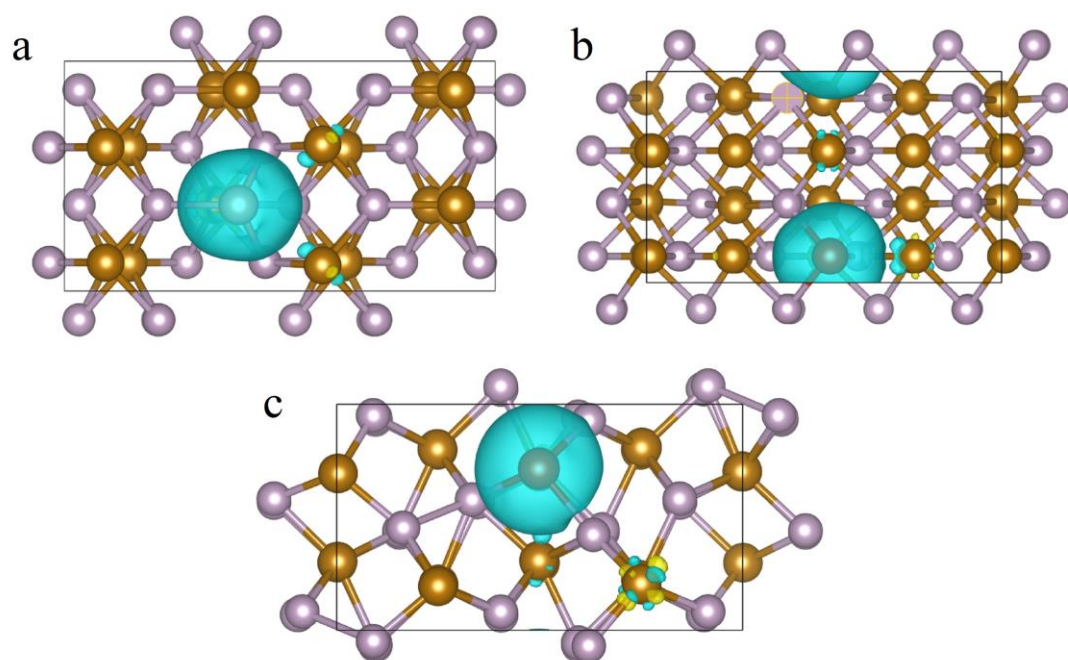

**Fig. S31.** Charge density difference analysis for (a) (010), (b) (001) and (c) (101) surfaces.

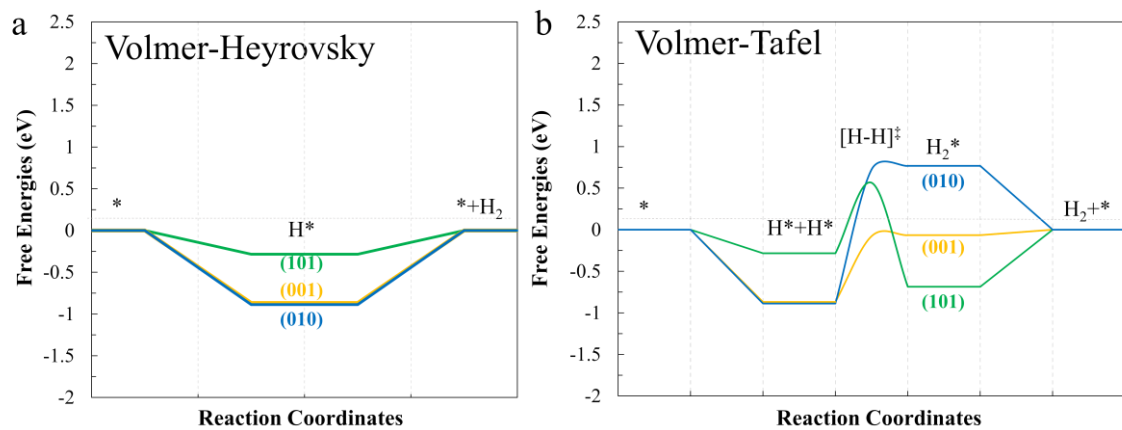

**Fig. S32. Energy diagrams of (a) Volmer-Heyrovsky and (b) Volmer-Tafel steps for FeP-(010), FeP-(001) and FeP-(101) systems.**



**Table S1.** Structural parameters extracted from the Ru K-edge EXAFS fitting. ( $S_0^2=0.86$ ).

| <i>Sample</i>      | <i>Scattering pair</i> | <i>CN</i>     | <i>R(Å)</i>     | $\sigma^2(10^{-3}\text{Å}^2)$ | $\Delta E_0(\text{eV})$ | <i>R factor</i> |
|--------------------|------------------------|---------------|-----------------|-------------------------------|-------------------------|-----------------|
| Ru-modified<br>FeP | Ru-P                   | $4.3 \pm 0.5$ | $2.37 \pm 0.01$ | $4.5 \pm 0.5$                 | $1.5 \pm 0.5$           | 0.003           |
|                    | Ru-Fe                  | $1.7 \pm 0.6$ | $2.76 \pm 0.01$ | $5.2 \pm 0.7$                 |                         |                 |
| Ru foil            | Ru-Ru <sub>1</sub>     | 6*            | $2.64 \pm 0.01$ | $3.2 \pm 0.4$                 | $2.0 \pm 0.5$           | 0.006           |
|                    | Ru-Ru <sub>2</sub>     | 6*            | $2.72 \pm 0.01$ | $3.5 \pm 0.4$                 |                         |                 |

**Table S2.** Structural parameters extracted from the Fe K-edge EXAFS fitting. ( $S_0^2=0.75$ ).

| <i>Sample</i>      | <i>Scattering pair</i> | <i>CN</i>     | <i>R</i> (Å)    | $\sigma^2(10^{-3}\text{Å}^2)$ | $\Delta E_0(\text{eV})$ | <i>R factor</i> |
|--------------------|------------------------|---------------|-----------------|-------------------------------|-------------------------|-----------------|
| Ru-modified<br>FeP | Fe-P                   | $6.0 \pm 0.6$ | $2.26 \pm 0.01$ | $5.2 \pm 0.5$                 | $1.5 \pm 0.5$           | 0.004           |
|                    | Fe-Fe                  | $4.1 \pm 0.5$ | $2.65 \pm 0.01$ | $6.2 \pm 0.6$                 |                         |                 |
| Fe foil            | Fe-Fe <sub>1</sub>     | 8*            | $2.47 \pm 0.01$ | $6.5 \pm 0.5$                 | $0.5 \pm 0.4$           | 0.005           |
|                    | Fe-Fe <sub>2</sub>     | 6*            | $2.84 \pm 0.01$ | $7.2 \pm 0.4$                 |                         |                 |

For the EXAFS fitting in Tables S1-S2 and S4-S5,  $S_0^2$  is the amplitude reduction factor; CN is the coordination number; R is interatomic distance (the bond length between Ru central atoms and surrounding coordination atoms);  $\sigma^2$  is Debye-Waller factor (a measure of thermal and static disorder in absorber-scatterer distances);  $\Delta E_0$  is edge-energy shift (the difference between the zero kinetic energy value of the sample and that of the theoretical model). R factor is used to value the goodness of the fitting.

\* This value was fixed during EXAFS fitting, based on the known structure of Ru foil and Fe foil.

Error bounds that characterize the structural parameters obtained by EXAFS spectroscopy were estimated as  $N \pm 20\%$ ;  $R \pm 1\%$ ;  $\sigma^2 \pm 20\%$ ;  $\Delta E_0 \pm 20\%$ .

**Table S3.** Comparison of HER performance between isolated single atom Ru-modified FeP and other electrocatalysts in acidic media.

| NO. | Catalyst                                               | Tafel slope (mV dec <sup>-1</sup> ) | Current density (j, mA/cm <sup>2</sup> ) | $\eta$ at the corresponding j (mV) | Reference                                                       |
|-----|--------------------------------------------------------|-------------------------------------|------------------------------------------|------------------------------------|-----------------------------------------------------------------|
|     | <b>Ru-modified FeP</b>                                 | <b>45</b>                           | <b>1</b>                                 | <b>15.6</b>                        | <b>This work</b>                                                |
|     |                                                        |                                     | <b>10</b>                                | <b>62</b>                          |                                                                 |
| 1   | Sv-MoS <sub>2</sub> nanoflakes                         | 73                                  | 10                                       | 194                                | <i>Angew. Chem.</i> <b>2019</b> , <i>131</i> , 2051.            |
| 2   | NFP/C-3(Ni-FeP)                                        | 54                                  | 10                                       | 72                                 | <i>Sci. Adv.</i> <b>2019</b> , <i>5</i> , 2.                    |
| 3   | NiCo <sub>2</sub> Px                                   | 59.6                                | 10                                       | 104                                | <i>Adv. Mater.</i> <b>2017</b> , <i>29</i> , 1605502.           |
| 4   | Ni <sub>2</sub> P@NPCNFs                               | 63.2                                | 10                                       | 56.7                               | <i>Angew. Chem.</i> <b>2018</b> , <i>130</i> , 1981.            |
| 5   | Co <sub>2</sub> P-C                                    | 68                                  | 10                                       | 96                                 | <i>J. Am. Chem. Soc.</i> <b>2017</b> , <i>139</i> , 11248.      |
| 6   | Cu <sub>3</sub> P@NPPC                                 | 76                                  | 10                                       | 89                                 | <i>Adv. Mater.</i> <b>2018</b> , <i>30</i> , 1703711.           |
|     |                                                        |                                     | 20                                       | 117                                |                                                                 |
|     |                                                        |                                     | 80                                       | 307                                |                                                                 |
| 7   | Mo <sub>2</sub> C@NC                                   | 60                                  | 10                                       | 124                                | <i>Angew. Chem. Int. Ed.</i> <b>2015</b> , <i>54</i> , 10752.   |
| 8   | Co-NRCNTs                                              | 69                                  | 10                                       | 260                                | <i>Angew. Chem. Int. Ed.</i> <b>2014</b> , <i>53</i> , 4372.    |
| 9   | Co-C-N Co mplex                                        | 55                                  | 10                                       | 138                                | <i>J. Am. Chem. Soc.</i> <b>2015</b> , <i>137</i> , 15070.      |
| 10  | Ni-Co-MoS <sub>2</sub>                                 | 51                                  | 10                                       | 155                                | <i>Adv. Mater.</i> <b>2016</b> , <i>28</i> , 9006               |
| 11  | mPF-Co-MoS <sub>2</sub>                                | 71                                  | 10                                       | 156                                | <i>Nat. Commun.</i> <b>2017</b> , <i>8</i> , 14430.             |
| 12  | MoCx nano-octahedrons                                  | 53                                  | 1                                        | 87                                 | <i>Nat. Commun.</i> <b>2015</b> , <i>6</i> , 6512.              |
|     |                                                        |                                     | 10                                       | 142                                |                                                                 |
| 13  | Co-NG                                                  | 82                                  | 10                                       | 147                                | <i>Nat. Commun.</i> <b>2015</b> , <i>6</i> , 8668.              |
| 14  | Fe-doped CoP/Ti                                        | 75                                  | 10                                       | 78                                 | <i>Adv. Mater.</i> <b>2017</b> , <i>29</i> , 1602441.           |
| 15  | CoP/CC                                                 | 51                                  | 10                                       | 67                                 | <i>J. Am. Chem. Soc.</i> <b>2014</b> , <i>136</i> , 7587-7590.  |
|     |                                                        |                                     | 20                                       | 100                                |                                                                 |
| 16  | double-gyroid MoS <sub>2</sub> /FTO                    | 50                                  | 2                                        | 190                                | <i>Nature Mater.</i> <b>2012</b> , <i>11</i> , 963-969.         |
| 17  | exfoliated WS <sub>2</sub> NS                          | 60                                  | 10                                       | 240                                | <i>Nature Mater.</i> <b>2013</b> , <i>12</i> , 850-855.         |
| 18  | Co:WS <sub>2</sub> /Co:W <sub>18</sub> O <sub>49</sub> | 49                                  | 10                                       | 210                                | <i>Energy Environ. Sci.</i> <b>2018</b> , <i>11</i> , 2270-2277 |

**Table S4.** Structural parameters extracted from the Ru K-edge EXAFS fitting. ( $S_0^2=0.86$ ).

| <i>Sample</i>               | <i>Scattering pair</i> | <i>CN</i>     | <i>R(Å)</i>     | <i><math>\sigma^2(10^{-3}\text{Å}^2)</math></i> | <i><math>\Delta E_0(eV)</math></i> | <i>R factor</i> |
|-----------------------------|------------------------|---------------|-----------------|-------------------------------------------------|------------------------------------|-----------------|
| Ru-modified<br>FeP at OCV   | Ru-P                   | $4.2 \pm 0.5$ | $2.41 \pm 0.01$ | $4.9 \pm 0.4$                                   | $2.5 \pm 0.5$                      | 0.004           |
|                             | Ru-Fe                  | $1.9 \pm 0.4$ | $2.76 \pm 0.01$ | $5.8 \pm 0.5$                                   |                                    |                 |
| Ru-modified<br>FeP at -80mV | Ru-P                   | $4.3 \pm 0.6$ | $2.43 \pm 0.01$ | $5.1 \pm 0.7$                                   | $2.5 \pm 0.5$                      | 0.005           |
|                             | Ru-Fe                  | $1.7 \pm 0.5$ | $2.77 \pm 0.01$ | $5.4 \pm 0.6$                                   |                                    |                 |

**Table S5.** Structural parameters extracted from the Fe K-edge EXAFS fitting. ( $S_0^2=0.75$ ).

| <i>Sample</i>                   | <i>Scattering pair</i> | <i>CN</i>     | <i>R(Å)</i>     | <i><math>\sigma^2(10^{-3}\text{Å}^2)</math></i> | <i><math>\Delta E_0(\text{eV})</math></i> | <i>R factor</i> |
|---------------------------------|------------------------|---------------|-----------------|-------------------------------------------------|-------------------------------------------|-----------------|
| Ru-modified<br>FeP at OCV       | Fe-P                   | $5.9 \pm 0.6$ | $2.26 \pm 0.01$ | $5.3 \pm 0.5$                                   | $2.0 \pm 0.4$                             | 0.005           |
|                                 | Fe-Fe                  | $3.9 \pm 0.4$ | $2.64 \pm 0.01$ | $5.7 \pm 0.7$                                   |                                           |                 |
| Ru-modified<br>FeP at -<br>80mV | Fe-P                   | $5.8 \pm 0.5$ | $2.26 \pm 0.01$ | $4.8 \pm 0.8$                                   | $2.0 \pm 0.4$                             | 0.006           |
|                                 | Fe-Fe                  | $4.0 \pm 0.6$ | $2.65 \pm 0.01$ | $6.1 \pm 0.6$                                   |                                           |                 |

**Table S6.** Information of the unit cell for DFT models.

|                  | <b>X (Å)</b> | <b>Y (Å)</b> | <b>Z (Å)</b> | <b><math>\alpha</math> (°)</b> | <b><math>\beta</math> (°)</b> | <b><math>\gamma</math> (°)</b> |
|------------------|--------------|--------------|--------------|--------------------------------|-------------------------------|--------------------------------|
| <b>FeP-(010)</b> | 6.101        | 11.493       | 25.786       | 90                             | 90                            | 90                             |
| <b>FeP-(001)</b> | 6.101        | 10.315       | 28.731       | 90                             | 90                            | 90                             |
| <b>FeP-(101)</b> | 10.315       | 6.506        | 24.406       | 117.964                        | 90                            | 90                             |

## References

1. P. Jiang, Q. Liu, Y. Liang, J. Tian, A. M. Asiri, X. Sun, *Angew. Chem., Int. Ed.* 2014, **53**, 12855-12859.
2. J. Yin, J. Jin, M. Lu, B. Huang, H. Zhang, Y. Peng, P. Xi and C.-H. Yan, *J. Am. Chem. Soc.* 2020, DOI: 10.1021/jacs.0c05050.
3. H.-W. Liang, S. Bruller, R. Dong, J. Zhang, X. Feng & K Mullen, *Nat. Commun.* 2020, **6**, 7992.
4. B. Ravel, M. Newville, *J. Synchrotron Rad.* 2005, **12**, 537-541.
5. P. E. Blöchl, *Phys. Rev. B: Condens. Matter Mater. Phys.* 1994, **50**, 17953-17979.
6. A. Jain, G. Hautier, S. P. Ong, C. J. Moore, C. C. Fischer, K. A. Persson, G. Ceder, *Phys. Rev. B: Condens. Matter Mater. Phys.* 2011, **84**, No. 045115.
7. D.-H. Seo, A. Urban, G. Ceder, *Phys. Rev. B: Condens. Matter Mater. Phys.* 2015, **92**,115118;
8. S. W. Kim, D. H. Seo, X. H. Ma, G. Ceder, K. Kang, *Adv. Energy Mater.* 2012, **2**, 710-721.
9. G. Henkelman, B. P. Uberuaga, H. A Jónsson, *J. Chem. Phys.* 2000, **113**, 9901-9904.
